# Supplementary material
Source: PubMed Central journal article supplement (PMC4793579)

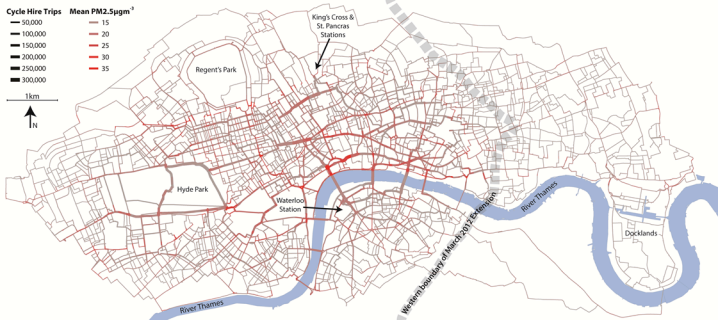

Supplement: wooj013225.wf1_default.pdf [file wooj013225.wf1_default.pdf]
